# Supplementary material
Source: HighWire-hosted journal article supplement (https://bmjopen.bmj.com/content/12/3/e053382)
Supplement: inline-supplementary-material-1 [file inline-supplementary-material-1.pdf]

**Appendix 1. ED Characteristics**

|                                      | <b>Maastad Hospital, Rotterdam, the Netherlands</b> | <b>Erasmus MC, Rotterdam, the Netherlands</b>                                   | <b>Hospital Fernando da Fonseca, Lisbon, Portugal</b>            | <b>St Mary's Hospital, London, United Kingdom</b>     | <b>General Hospital, Vienna, Austria</b>              |
|--------------------------------------|-----------------------------------------------------|---------------------------------------------------------------------------------|------------------------------------------------------------------|-------------------------------------------------------|-------------------------------------------------------|
| Hospital characteristics             | Teaching hospital<br>59 paediatric beds             | University hospital<br>60 paediatric beds                                       | Community hospital<br>91 paediatric beds                         | University hospital<br>46 paediatric beds             | University hospital<br>74 paediatric beds             |
| Catchment area                       | Urban<br><br>Generally low socio-economic status    | Urban<br><br>Mixed high and low socio-economic status                           | Mixed urban and rural<br><br>Generally low socio-economic status | Urban<br><br>Mixed high and low socio-economic status | Urban<br><br>Mixed high and low socio-economic status |
| Emergency department characteristics | Mixed adult-paediatric<br><br>9500 children/year    | Paediatric only till October 2014, from then on mixed<br><br>6500 children/year | Paediatric only<br><br>60,000 children/year                      | Paediatric only<br><br>27,000 children/year           | Paediatric only<br><br>22,000 children/year           |
| Supervising physician                | Paediatrician                                       | Paediatrician                                                                   | Paediatrician                                                    | Paediatric emergency physician                        | Paediatrician                                         |
| Inclusion period                     | 01-05-2014 to 31-10-2015                            | 01-01-2012 to 31-12-2014                                                        | 01-03-2014 to 28-02-2015                                         | 01-07-2014 to 28-02-2015                              | 01-01-2014 to 31-12-2014                              |
| Number of patients included          | 10,484                                              | 13,968                                                                          | 53,175                                                           | 15,027                                                | 19,268                                                |
| Primary care availability            | 24/7                                                | 24/7                                                                            | Daytime and evenings                                             | Daytime and evenings                                  | Daytime                                               |
| Referral by emergency service        | 4.5%                                                | 8.9%                                                                            | 4.0%                                                             | 5.6%                                                  | Not available                                         |
| Self-referral                        | 17%                                                 | 27%                                                                             | 96%                                                              | 82%                                                   | >90%*                                                 |
| Comorbidity in all children          | <10%*                                               | 38%                                                                             | <10%*                                                            | 11%                                                   | 10%                                                   |

**Appendix 2. MTS presentational flow charts reclassified into 10 presentational flow chart categories**

| Category                                  | MTS presentational flow charts[15]                                                                                       |
|-------------------------------------------|--------------------------------------------------------------------------------------------------------------------------|
| Cardiac                                   | Chest pain, palpitations                                                                                                 |
| Dermatologic                              | Abscesses and local infections, bites and stings, burns and scalds, rashes, Wounds                                       |
| Ear Nose Throat                           | Ear problems, facial problems, sore throat                                                                               |
| Gastrointestinal                          | Abdominal pain in adults, abdominal pain in children, diarrhoea and vomiting, gastrointestinal bleeding                  |
| Neurologic, psychiatric and intoxications | Apparently drunk, behaving strangely, collapsed adult, fits, Headache, mental illness, overdose and poisoning, self-harm |
| Respiratory                               | Asthma, shortness of breath in adults, shortness of breath in children                                                   |
| Trauma/Muscular                           | Assault, back pain, falls, head injury, limping child, limb problems, major trauma, neck pain, torso injury              |
| Unwell                                    | Crying baby, irritable child, unwell adult, unwell child, worried parent                                                 |
| Urinary/gynaecological                    | Pregnancy, per vaginum bleeding, sexually acquired infection, testicular pain, urinary problems                          |
| Other                                     | Allergy, dental problems, diabetes, eye problems, exposure to chemicals, foreign body, major incidents                   |
